# Supplementary material
Source: Springer Nature journal article supplement (https://www.springermedizin.de/resource/supplementary/13023_2013_725_MOESM4_ESM.pdf/9642954)

**a**

D174

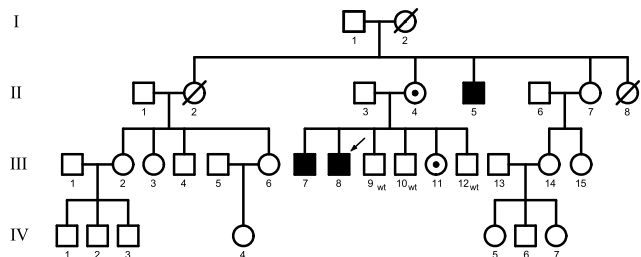**b**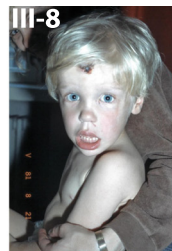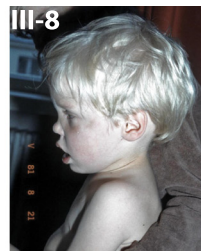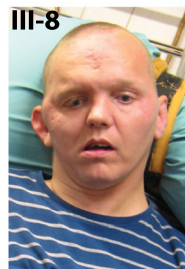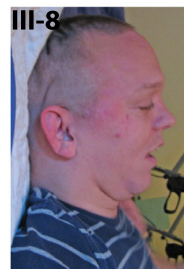**c**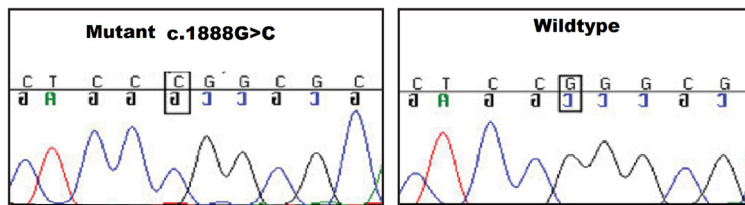**d**

|                  |               |
|------------------|---------------|
| GRIA3_Cow        | SPRSLSGRIVGGV |
| GRIA3_Dog        | SPRSLSGRIVGGV |
| GRIA3_Chimpanzee | SPRSLSGRIVGGV |
| GRIA3_Rat        | SPRSLSGRIVGGV |
| GRIA3_Human      | SPRSLSGRIVGGV |
| GRIA3_Mouse      | SPRSLSGRIVGGV |
| GRIA3_Chicken    | SPRSLSGRIVGGV |
| GRIA3_ZebraFish  | SPRSLSGRIVGGV |

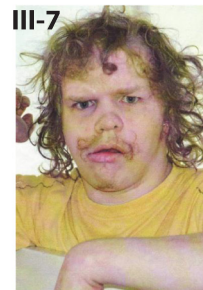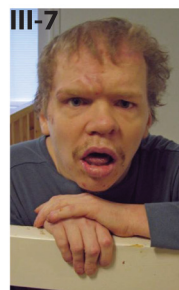

Supplement: MOESM4 [file 9642954]
